# Supplementary material
Source: PubMed Central journal article supplement (PMC3879447)

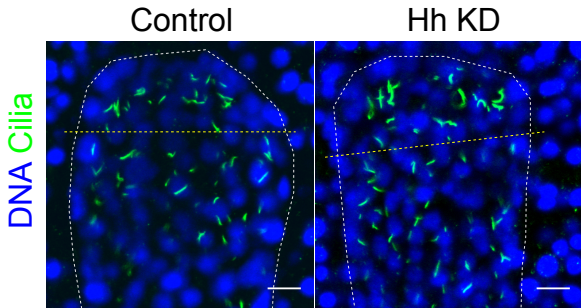

|                  |             |             |
|------------------|-------------|-------------|
| Avg Cilia Length | 4.1 $\mu$ m | 4.4 $\mu$ m |
| Std Dev          | 0.9 $\mu$ m | 1.0 $\mu$ m |
| Significance     | $p = 0.25$  |             |

Supplement: supp_mst176_Supp_Figure_1.pdf [file supp_mst176_Supp_Figure_1.pdf]
